# Supplementary material
Source: PubMed Central journal article supplement (PMC3113455)
Supplement: NIHMS267363-supplement-3.pdf [file NIHMS267363-supplement-3.pdf]

**Article Title:** Dosimetry of  $^{18}\text{F}$ -Labeled Tyrosine Kinase Inhibitor SKI-249380, a Dasatinib-Tracer for PET Imaging

**Journal Name:** Molecular Imaging and Biology

**Authors:** Mark P. Dunphy\*, Patrizio Anzonic, Darren Veach, Romel Somwar, Nagavarakishore Pillarsetty, Jason Lewis, Steven Larson

\* **Correspondence:** Memorial Sloan Kettering Cancer Center, 1275 York Avenue, Box 77, Room H-214B, New York, New York 10065. E-mail: dunphy\_m@mskcc.org, Telephone: 1-212-639-8131, Fax: 1-212-717-3263.

### **Online Resource 3.**

The reference organ masses listed in the table were used for allometric scaling of individual experimental organ activity-time data, in mouse-to-man conversions, as described in Methods (in main article, see Methods: *Organ Time Integrated Activity Coefficients*). Organs-of-interest included those with  $^{18}\text{F}$ -SKI-249380 uptake distinct, scintigraphically, from the remainder of the body, including organs with relatively high-uptake and deficit organs. The reference human organ masses listed follow the adult male model implemented in OLINDA/EXM dosimetry software (v.1, Vanderbilt University, Nashville, TN.)[\[1\]](#)

Mouse and Human Normal Masses of Organs-of-Interest with Distinct  $^{18}\text{F}$ -SKI-249380 Uptake (including Deficit Organs) Relative to the Remainder of Body

|                | <b>Mouse</b>    | <b>Standard Human</b> |
|----------------|-----------------|-----------------------|
| <b>Organ</b>   | <i>Mass (g)</i> | <i>Mass (g)</i>       |
| Heart contents | 0.132           | 316                   |
| Lung           | 0.170           | 1,000                 |
| Liver          | 0.778           | 1,910                 |
| Kidney         | 0.165           | 418                   |
| Muscle         | 18.50           | 51,800                |
| Bone           | 3.50            | 10,000 / 120 *        |
| Brain          | 0.369           | 1,420                 |
| <i>Total</i>   | 24.473          | 73,700                |

\* 10,000 g refers to the mass of the total *bone volume*. For allometry and dosimetry, the standard human 120 g *bone surface* mass was used. The ICRP has suggested that radionuclides with half-times less than 10 days be assigned to bone surfaces; radionuclides with longer half-times being assigned to bone volume.[2]

### **Bibliography**

1. Stabin MG, Sparks RB, Crowe E. OLINDA/EXM: the second-generation personal computer software for internal dose assessment in nuclear medicine. *J Nucl Med*. 2005;46:1023-1027.
2. International Commission on Radiological Protection. Limits for Intakes of Radionuclides by Workers. ICRP Publication 30, Pergamon Press, New York, 1979.
